# Supplementary material
Source: PubMed Central journal article supplement (PMC7959450)
Supplement: jm9b01990_si_002.pdf [file jm9b01990_si_002.pdf]

**Supporting Information For:**

“Twelfth-Position Deuteration of Nevirapine Reduces 12-Hydroxy-Nevirapine Formation and Nevirapine-Induced Hepatocyte Death”

Carley J.S. Heck<sup>a</sup>, Herana Kamal Seneviratne<sup>b</sup>, Namandjé N. Bumpus<sup>a,b,\*</sup>

<sup>a</sup> Department of Pharmacology & Molecular Sciences, Johns Hopkins University School of Medicine, Baltimore, MD 21205, USA

<sup>b</sup> Department of Medicine – Division of Clinical Pharmacology, Johns Hopkins University School of Medicine, Baltimore, MD 21205, USA

\* Corresponding author

**Contents:**

Supplemental Figure 1. Fragment selection for uHPLC-MS/MS based quantitation of monooxygenated NVP and 12-D<sub>3</sub>NVP metabolites. ....Page S4

Supplemental Figure 2. Extracted ion chromatograms of an O-glucuronidated NVP and 12-D<sub>3</sub>NVP metabolite formed in primary mouse hepatocytes. ...Page S6

Supplemental Figure 3. Representative fragmentation spectra for an O-glucuronidated NVP and 12-D<sub>3</sub>NVP metabolite formed in primary mouse hepatocytes. ....Page S7

Supplemental Figure 4. NVP cytochrome P450-dependent metabolism in human liver microsomes during co-incubations with cytochrome P450 inhibitors. ....  
.....Page S8

Supplemental Figure 5. Extracted ion chromatograms of a glutathione conjugated NVP and 12-D<sub>3</sub>NVP metabolite formed in primary mouse hepatocytes. .Page S10

Supplemental Figure 6. Representative fragmentation spectra for a glutathione conjugated NVP and 12-D<sub>3</sub>NVP metabolite formed in primary mouse hepatocytes. ....Page S11

Supplemental Table 1. Relative-quantitation proteomics analysis of protein expression changes with NVP treatment of primary mouse hepatocytes. ....  
.....Page S12

Supplemental Table 2. Relative-quantitation proteomics analysis of protein expression changes with 12-D<sub>3</sub>NVP treatment of primary mouse hepatocytes. ....  
.....Page S14

Supplemental Table 3. Relative-quantitation proteomics analysis of protein expression changes with NVP treatment of cryopreserved human hepatocytes. ..  
.....Page S16

Supplemental Table 4. Relative-quantitation proteomics analysis of protein expression changes with 12-D<sub>3</sub>NVP treatment of cryopreserved human hepatocytes. ....Page S18

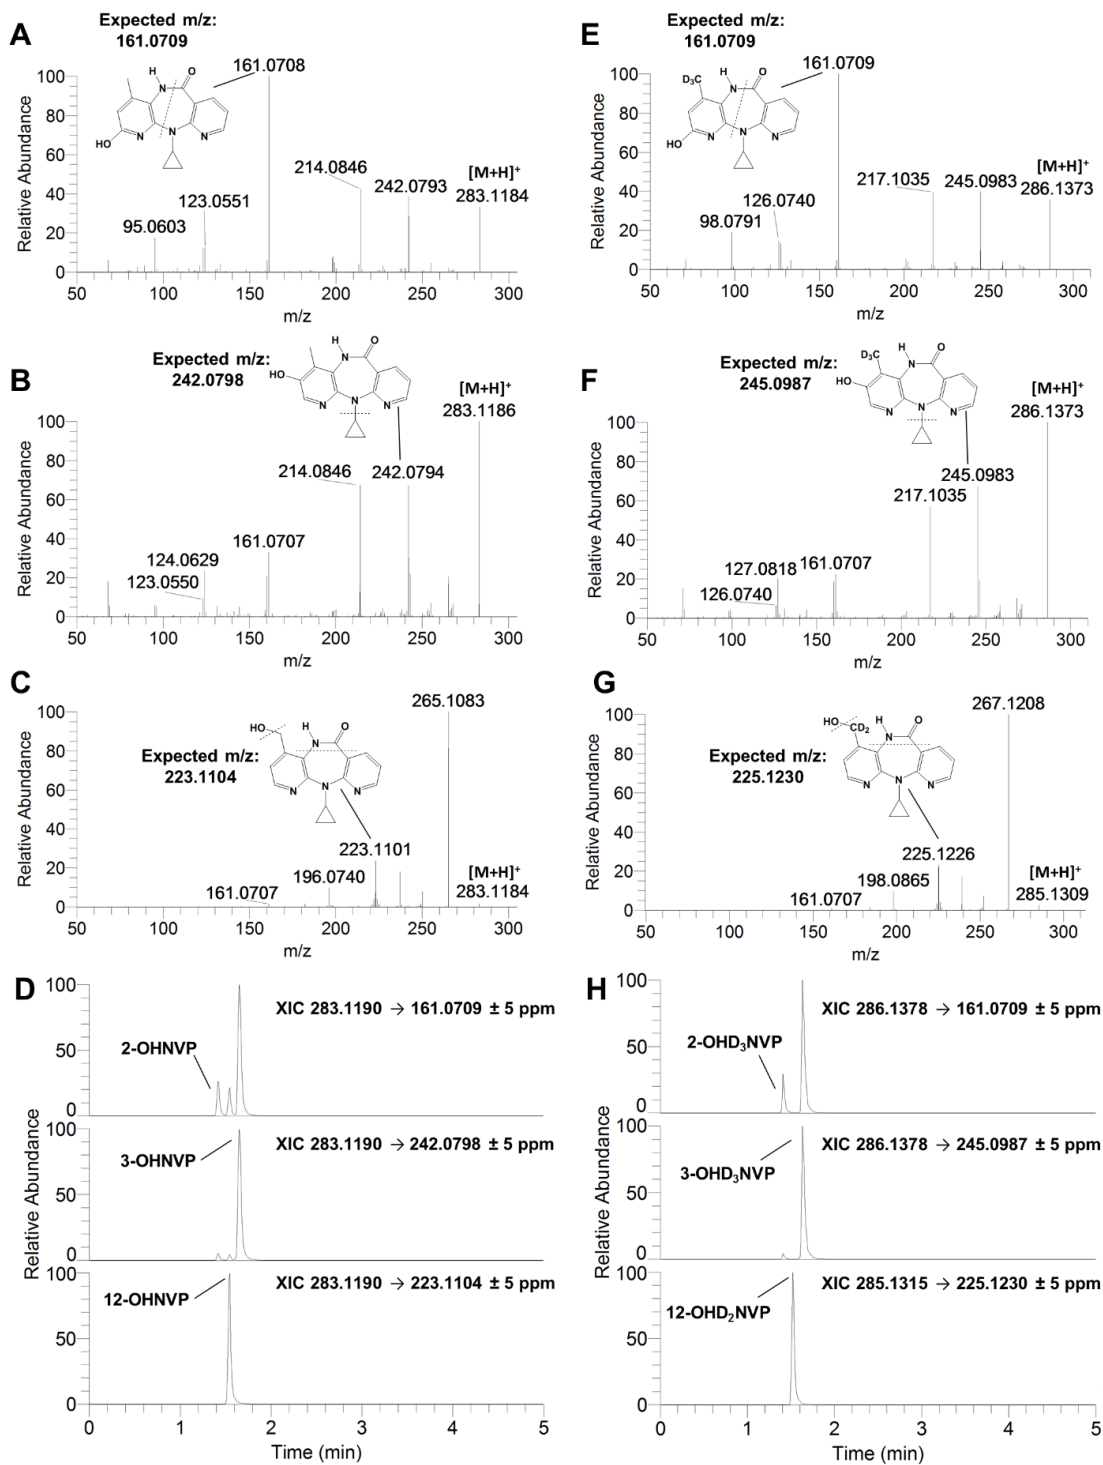

**Supplemental Figure 1. Fragment selection for uHPLC-MS/MS based quantitation of monoxygenated NVP and 12-D<sub>3</sub>NVP metabolites.** Fresh primary mouse hepatocytes from male C57BL/6J mice were cultured and treated with 10 μM NVP or 12-D<sub>3</sub>NVP for 24 hours. Metabolites were extracted from the medium from these treatments and subjected to uHPLC-MS/MS (orbitrap)

analysis. Representative fragmentation spectra are shown for the following metabolites from NVP incubations: 2-OHNVP (A), 3-OHNVP (B), and 12-OHNVP (C), with the selected fragmentation ions used for quantitation and their proposed sites of fragmentation highlighted. The high resolution parent mass is indicated as  $[M+H^+]$ . The extracted ion chromatograms (XICs) of these fragments from incubations with NVP are shown, with the metabolite highlighted that is quantified with each mass transition (D). Representative fragmentation spectra are also shown for the following metabolites from 12-D<sub>3</sub>NVP incubations: 2-OHD<sub>3</sub>NVP (E), 3-OHD<sub>3</sub>NVP (F), and 12-OHD<sub>2</sub>NVP (G), with the selected fragmentation ions used for quantitation and their proposed sites of fragmentation highlighted. The extracted ion chromatograms (XICs) of these fragments from incubations with 12-D<sub>3</sub>NVP are shown (H). Results are representations of four experimental replicates.

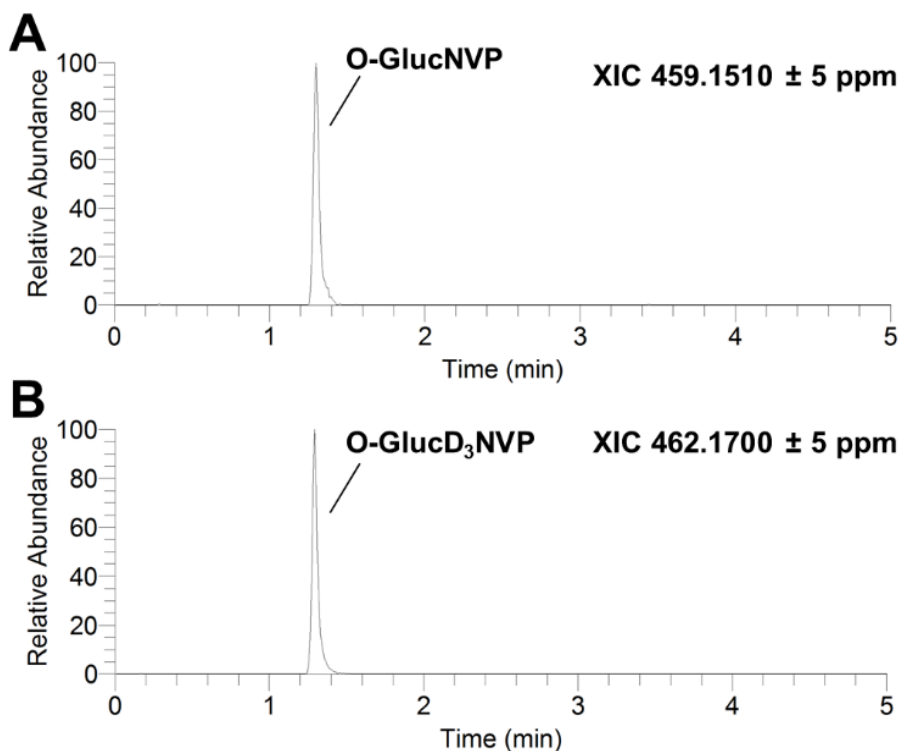

**Supplemental Figure 2. Extracted ion chromatograms of an O-glucuronidated NVP and 12-D<sub>3</sub>NVP metabolites formed in primary mouse hepatocytes.** Fresh primary mouse hepatocytes from male C57BL/6J mice were cultured and treated with 10  $\mu$ M NVP or 12-D<sub>3</sub>NVP for 24 hours. Metabolites were extracted from the cell culture medium and subjected to uHPLC-MS (orbitrap) analysis. The following high resolution ions were observed to assay for the presence of P450 metabolites: 459.1510  $\pm$  5 ppm for O-glucuronidated, undeuterated NVP (O-GlucNVP) and 462.1700  $\pm$  5 ppm for O-glucuronidated, trideuterated NVP (O-GlucD<sub>3</sub>NVP). Representative extracted ion chromatograms (XICs) from this analysis are shown for O-GlucNVP formed during incubations with NVP (A) and O-GlucD<sub>3</sub>NVP formed during incubations with 12-D<sub>3</sub>NVP (B). Results are representations of four experimental replicates.

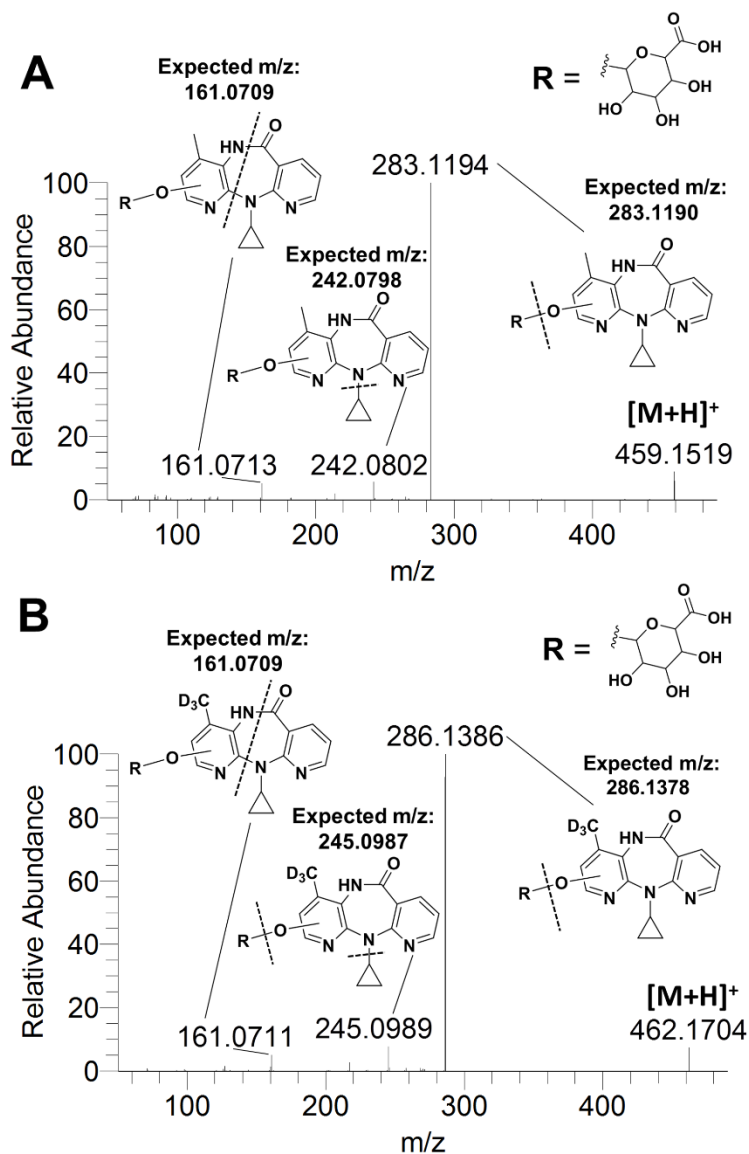

**Supplemental Figure 3. Representative fragmentation spectra for an O-glucuronidated NVP and 12-D<sub>3</sub>NVP metabolite formed in primary mouse hepatocytes.** Fresh primary mouse hepatocytes from male C57BL/6J mice were cultured and treated with 10  $\mu$ M NVP or 12-D<sub>3</sub>NVP for 24 hours. Metabolites were extracted from the cell culture medium and subjected to uHPLC-MS/MS (Orbitrap) analysis. Fragmentation scans for the following ions were performed: 459.1510  $\pm$  5 ppm for O-glucuronidated, undeuterated NVP (O-GlucNVP) and 462.1700  $\pm$  5 ppm for O-glucuronidated, trideuterated NVP (O-GlucD<sub>3</sub>NVP). Representative fragmentation spectra for these ions are shown for O-GlucNVP formed during incubations with NVP (A) and O-GlucD<sub>3</sub>NVP formed during incubations with 12-D<sub>3</sub>NVP (B). The high resolution parent mass is indicated as [M+H<sup>+</sup>], and the high resolution fragments used for structural confirmation are indicated, along with their predicted sites of fragmentation. Results are representations of four experimental replicates.

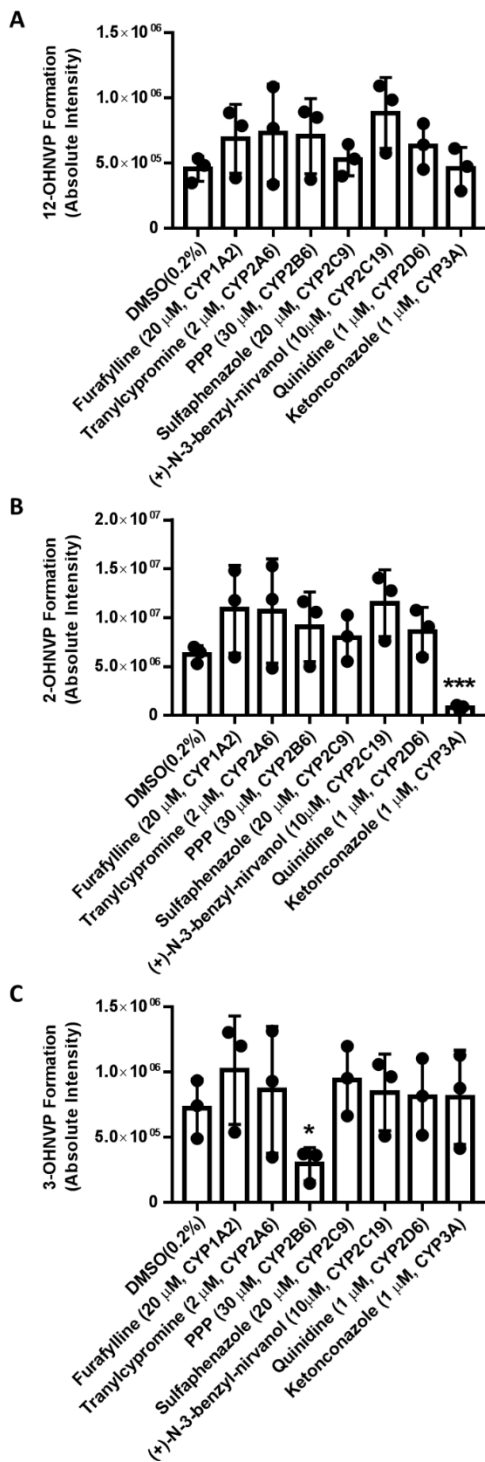

**Supplemental Figure 4. NVP cytochrome P450-dependent metabolism in human liver microsomes during co-incubations with cytochrome P450 inhibitors.** Liver microsomes (0.5 mg/mL) prepared from human liver were incubated with NVP (10 μM) and NADPH regenerating reagents for one hour either with additional vehicle as a control (0.2% DMSO) or with the following Cytochrome P450 inhibitors: 20 μM furafylline (CYP1A2 inhibitor), 2 μM tranylcyromine (CYP2A6 inhibitor), 30 μM PPP (CYP2B6 inhibitor), 20 μM



sulfaphenazole (CYP2C9 inhibitor), 10  $\mu$ M (+)-N-3-benzyl-nirvanol (CYP2C19 inhibitor), 1  $\mu$ M quinidine (CYP2D6 inhibitor), or 1  $\mu$ M ketoconazole (CYP3A inhibitor). Metabolites were measured using uHPLC-MS/MS (Orbitrap) detection. 12-OHNVP (A), 2-OHNVP (B), and 3-OHNVP (C) were monitored using MS/MS scans for the following transitions: 283.1190  $\rightarrow$  223.1104  $m/z$  (12-OHNVP), 283.1190  $\rightarrow$  161.0709  $m/z$  (2-OHNVP), and 283.1190  $\rightarrow$  242.0798  $m/z$  (3-OHNVP). Data are representative of the mean  $\pm$  standard deviation of three experimental replicates. Significant differences in inhibitor containing incubations to vehicle control incubations were determined using an unpaired t-test generating two-tailed P values (\* P < 0.05 and \*\*\* P < 0.001).

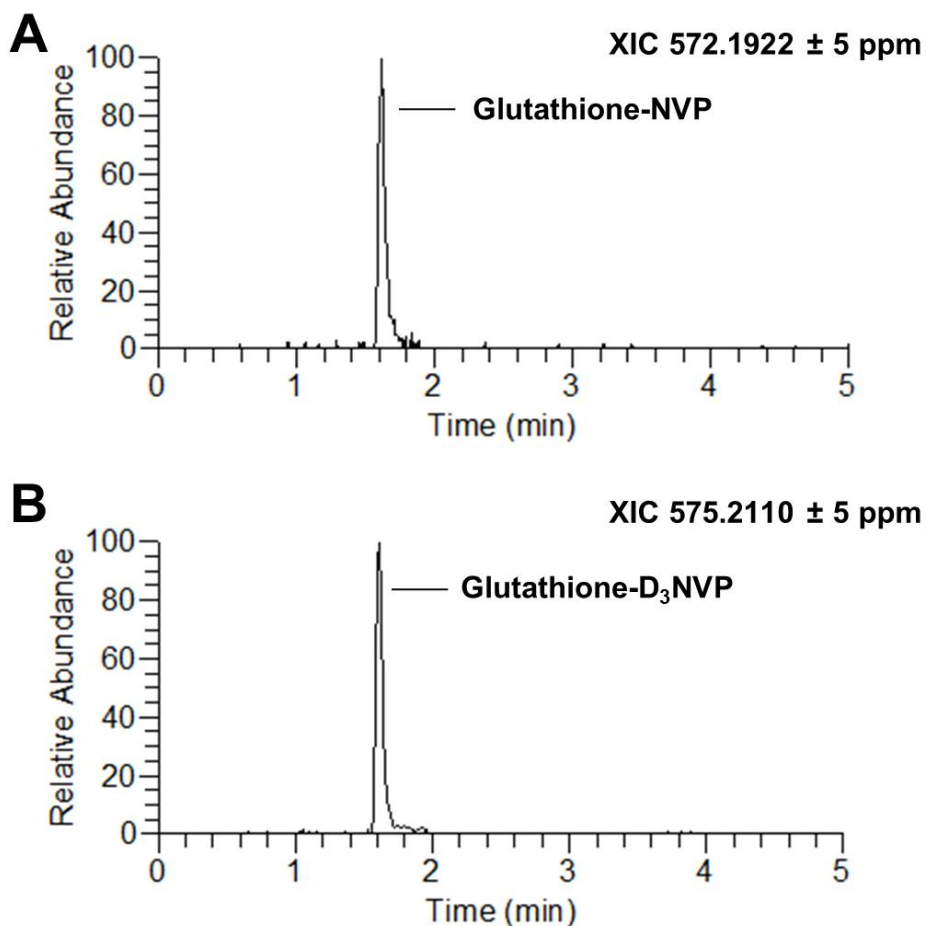

**Supplemental Figure 5. Extracted ion chromatograms of a glutathione conjugated NVP and 12-D<sub>3</sub>NVP metabolites formed in primary mouse hepatocytes.** Fresh primary mouse hepatocytes from male C57BL/6J mice were cultured and treated with 10 μM NVP or 12-D<sub>3</sub>NVP for 24 hours. Metabolites were extracted from isolated cell pellets and subjected to uHPLC-MS (Orbitrap) analysis. The following high resolution ions were observed to assay for the presence of P450 metabolites: 572.1922 ± 5 ppm for glutathione conjugated, undeuterated NVP (Glutathione-NVP) and 575.2110 ± 5 ppm for glutathione conjugated, trideuterated NVP (Glutathione-D<sub>3</sub>NVP). Representative extracted ion chromatograms (XICs) from this analysis are shown for glutathione conjugates formed during incubations with NVP (A) and with 12-D<sub>3</sub>NVP (B). Results are representations of four experimental replicates.

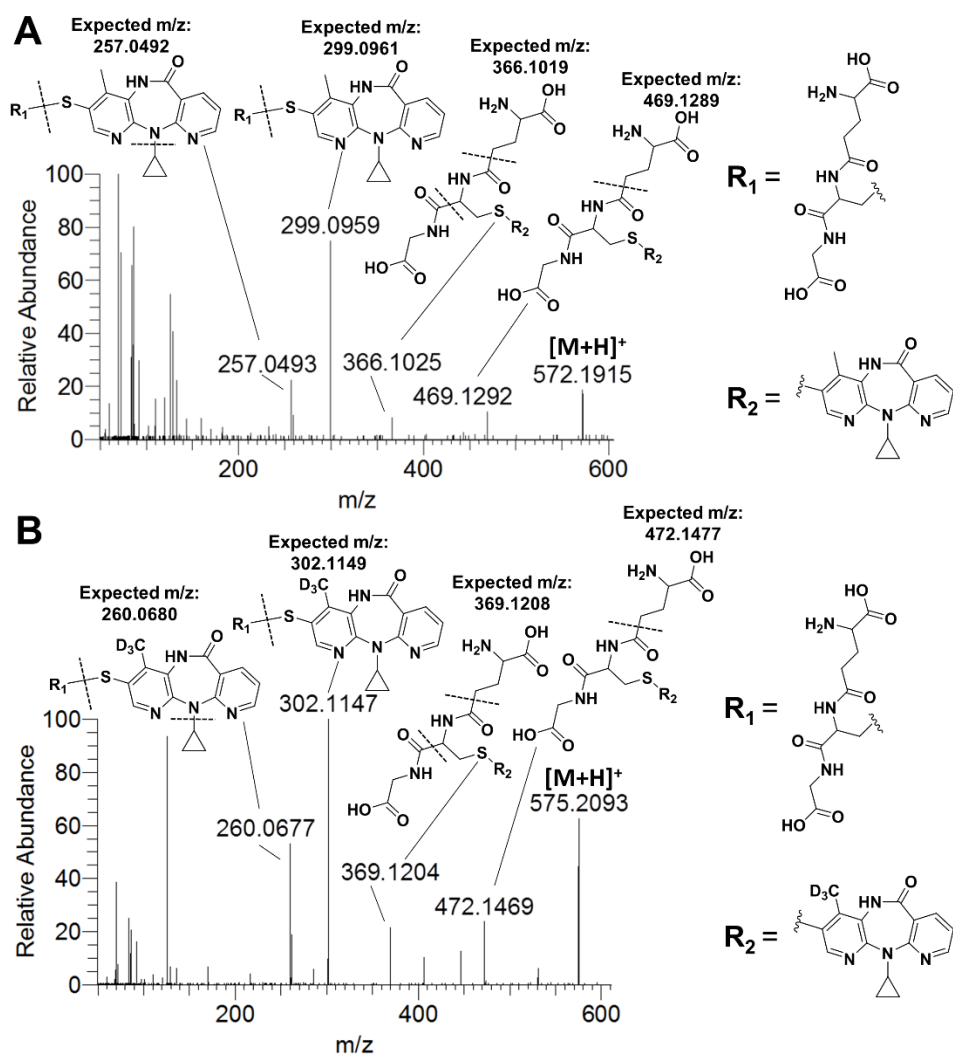

**Supplemental Figure 6. Representative fragmentation spectra for a glutathione conjugated NVP and 12-D<sub>3</sub>NVP metabolites formed in primary mouse hepatocytes.** Fresh primary mouse hepatocytes from male C57BL/6J mice were cultured and treated with 10 μM NVP or 12-D<sub>3</sub>NVP for 24 hours. Metabolites were extracted from isolated cell pellets and subjected to uHPLC-MS/MS (Orbitrap) analysis. Fragmentation scans for the following ions were performed: 572.1922 ± 5 ppm for glutathione conjugated, undeuterated NVP (Glutathione-NVP) and 575.2110 ± 5 ppm for glutathione conjugated, trideuterated NVP (Glutathione-D<sub>3</sub>NVP). Representative fragmentation spectra for these ions are shown for glutathione conjugates formed during incubations with NVP (A) and 12-D<sub>3</sub>NVP (B). The high resolution parent mass is indicated as [M+H]<sup>+</sup>, and the high resolution fragments used for structural confirmation are indicated, along with their predicted sites of fragmentation. Results are representations of four experimental replicates.

| Protein Changes with NVP Treatment (in comparison to Vehicle) |                                                                               |                  |                    |                |
|---------------------------------------------------------------|-------------------------------------------------------------------------------|------------------|--------------------|----------------|
| <u>UniProt Accession</u>                                      | <u>UniProt Entry</u>                                                          | <u>Gene Name</u> | <u>Fold Change</u> | <u>P-Value</u> |
| P70404                                                        | Isocitrate dehydrogenase [NAD] subunit gamma 1, mitochondrial                 | <i>Idh3g</i>     | 1.8 ± 0.36         | 0.0071         |
| P60710                                                        | Actin, cytoplasmic 1                                                          | <i>Actb</i>      | 1.15 ± 0.64        | 0.8847         |
| A0A0A0MQF6                                                    | Glyceraldehyde-3-phosphate dehydrogenase                                      | <i>Gapdh</i>     | -1.01 ± 0.33       | 0.8643         |
| Q9DBG7                                                        | Signal recognition particle receptor subunit alpha                            | <i>Srpra</i>     | -1.27 ± 0.1        | 0.0408         |
| Q9D710                                                        | Thioredoxin-related transmembrane protein 2                                   | <i>Tmx2</i>      | -1.39 ± 0.1        | 0.0310         |
| Q569Z6                                                        | Thyroid hormone receptor-associated protein 3                                 | <i>Thrap3</i>    | -1.46 ± 0.09       | 0.0064         |
| Q9DB05                                                        | Alpha-soluble NSF attachment protein                                          | <i>Napa</i>      | -1.48 ± 0.09       | 0.0108         |
| Q8C2T9                                                        | Putative uncharacterized protein                                              | <i>Ik</i>        | -1.51 ± 0.19       | 0.0484         |
| A1L2Z3                                                        | C230096C10Rik protein                                                         | <i>Emc1</i>      | -1.52 ± 0.13       | 0.0404         |
| Q3UMF0                                                        | Cordon-bleu protein-like 1                                                    | <i>Cobl1</i>     | -1.58 ± 0.18       | 0.0477         |
| Q8BFP9                                                        | Pyruvate dehydrogenase (acetyl-transferring)] kinase isozyme 1, mitochondrial | <i>Pdk1</i>      | -1.66 ± 0.09       | 0.0394         |
| Q3TKM9                                                        | Actin-related protein 2/3 complex subunit 5                                   | <i>Arpc5</i>     | -1.69 ± 0.1        | 0.0061         |
| Q542U7                                                        | LSM6 homolog, U6 small nuclear RNA associated ( <i>S. cerevisiae</i> )        | <i>Lsm6</i>      | -1.72 ± 0.22       | 0.0292         |
| Q91VC3                                                        | Eukaryotic initiation factor 4A-III                                           | <i>Eif4a3</i>    | -2.02 ± 0.12       | 0.0047         |
| Q9Z1N5                                                        | Spliceosome RNA helicase Ddx39b                                               | <i>Ddx39b</i>    | -2.15 ± 0.16       | 0.0381         |
| Q91W92                                                        | Cdc42 effector protein 1                                                      | <i>Cdc42ep1</i>  | -2.54 ± 0.05       | 0.0039         |
| P13597                                                        | Intercellular adhesion molecule 1                                             | <i>Icam1</i>     | -2.85 ± 0.01       | 0.0001         |
| Q9DC13                                                        | Lysosomal membrane glycoprotein 1, isoform CRA_a                              | <i>Lamp1</i>     | -3.24 ± 0.19       | 0.0336         |
| P70318                                                        | Nucleolysin TIAR                                                              | <i>Tial1</i>     | Not found with NVP | 0.0047         |
| D3Z5N6                                                        | Zinc finger protein ubi-d4                                                    | <i>Dpf2</i>      | Not found with NVP | 0.0038         |

**Supplemental Table 1. Relative-quantitation proteomics analysis of protein expression changes with NVP treatment of primary mouse hepatocytes.**

Freshly isolated primary mouse hepatocytes were treated for 8 hours with vehicle (0.2% DMSO) or 400  $\mu$ M NVP. Cell lysate was then prepared for and subjected to Top10 nanoLC-MS based proteomics, with data analysis performed in Proteome Discoverer 2.1, using Sequest HT for peptide spectral matching/protein identification and precursor ion area detection for relative quantitation. Up to 10 unique or razor peptides were used in protein precursor ion-based quantitation. Statistically significant relative-quantitation changes are shown for treatment with NVP as compared to vehicle, as well as the results for housekeeping proteins actin and GAPDH. UniProt proteome *Mus musculus* 10090 was used for protein identification profiling, with UniProt accession numbers, protein entry (protein name), and gene name's provided. P-values were generated using un-paired t-test and effect size calculated using Cohen's d equation. Data are representative of four biological replicates.

| Protein Changes with 12-D <sub>3</sub> NVP Treatment (in comparison to Vehicle) |                                                                    |                  |                                      |                |
|---------------------------------------------------------------------------------|--------------------------------------------------------------------|------------------|--------------------------------------|----------------|
| <u>UniProt Accession</u>                                                        | <u>UniProt Entry</u>                                               | <u>Gene Name</u> | <u>Fold Change</u>                   | <u>P-Value</u> |
| Q8BKT7                                                                          | THO complex subunit 5 homolog                                      | <i>Thoc5</i>     | Not found with DMSO                  | 0.0072         |
| A2AIL4                                                                          | NADH dehydrogenase (ubiquinone) complex I, assembly factor 6       | <i>Ndufaf6</i>   | Not found with DMSO                  | 0.0089         |
| P47876                                                                          | Insulin-like growth factor-binding protein 1                       | <i>Igfbp1</i>    | 4.18 ± 1.16                          | 0.0179         |
| O35405                                                                          | Phospholipase D3                                                   | <i>Pld3</i>      | 3.36 ± 0.98                          | 0.0250         |
| Q9DAS9                                                                          | Guanine nucleotide-binding protein G(I)/G(S)/G(O) subunit gamma-12 | <i>Gng12</i>     | 2.41 ± 0.98                          | 0.0408         |
| Q3TJ01                                                                          | tRNA-splicing ligase RtcB homolog                                  | <i>Rtcb</i>      | 1.65 ± 0.47                          | 0.0340         |
| Q3TND1                                                                          | Peptidyl-prolyl cis-trans isomerase                                | <i>Fkbp2</i>     | 1.57 ± 0.31                          | 0.0295         |
| P60710                                                                          | Actin, cytoplasmic 1                                               | <i>Actb</i>      | 1.19 ± 0.68                          | 0.7786         |
| A0A0A0MQF6                                                                      | Glyceraldehyde-3-phosphate dehydrogenase                           | <i>Gapdh</i>     | 1.11 ± 0.53                          | 0.6387         |
| P13597                                                                          | Intercellular adhesion molecule 1                                  | <i>Icam1</i>     | -1.36 ± 0.03                         | 0.0015         |
| Q3TEX7                                                                          | Putative uncharacterized protein                                   | <i>Mfn2</i>      | -1.45 ± 0.09                         | 0.0266         |
| P11352                                                                          | Glutathione peroxidase 1                                           | <i>Gpx1</i>      | -1.5 ± 0.03                          | 0.0028         |
| Q9DBG7                                                                          | Signal recognition particle receptor subunit alpha                 | <i>Srpra</i>     | -1.58 ± 0.17                         | 0.0225         |
| Q14C24                                                                          | MCG14259, isoform CRA_a                                            | <i>U2af1</i>     | -1.95 ± 0.13                         | 0.0042         |
| B9EKL6                                                                          | MCG114106                                                          | <i>Ptp4a1</i>    | -2.16 ± 0.2                          | 0.0179         |
| Q92111                                                                          | Serotransferrin                                                    | <i>Tf</i>        | -2.22 ± 0.07                         | 0.0057         |
| Q3UUI3                                                                          | Acyl-coenzyme A thioesterase THEM4                                 | <i>Them4</i>     | -3.18 ± 0.16                         | 0.0460         |
| P15116                                                                          | Cadherin-2                                                         | <i>Cdh2</i>      | Not found with 12-D <sub>3</sub> NVP | 0.0385         |

**Supplemental Table 2. Relative-quantitation proteomics analysis of protein expression changes with 12-D<sub>3</sub>NVP treatment of primary mouse hepatocytes.** Freshly isolated primary mouse hepatocytes were treated for 8 hours with vehicle (0.2% DMSO) or 400 μM 12-D<sub>3</sub>NVP. Cell lysate was then prepared for and subjected to Top10 nanoLC-MS based proteomics, with data analysis performed in Proteome Discoverer 2.1, using Sequest HT for peptide spectral matching/protein identification and precursor ion area detection for relative quantitation. Up to 10 unique or razor peptides were used in protein precursor ion-based quantitation. Statistically significant relative-quantitation changes are shown for treatment with 12-D<sub>3</sub>NVP as compared to vehicle, as well as the results for housekeeping proteins actin and GAPDH. UniProt proteome *Mus musculus* 10090 was used for protein identification profiling, with UniProt accession numbers, protein entry (protein name), and gene name's provided. P-values were generated using un-paired t-test and effect size calculated using Cohen's d equation. Data are representative of four biological replicates.

| Protein Changes with NVP Treatment (in comparison to Vehicle) |                                                                                       |                  |                    |                |
|---------------------------------------------------------------|---------------------------------------------------------------------------------------|------------------|--------------------|----------------|
| <u>UniProt Accession</u>                                      | <u>UniProt Entry</u>                                                                  | <u>Gene Name</u> | <u>Fold Change</u> | <u>P-Value</u> |
| Q13098                                                        | Isoform 3 of COP9 signalosome complex subunit 1                                       | <i>GPS1</i>      | 2.06 ± 0.26        | 0.0289         |
| Q13190                                                        | Syntaxin-5                                                                            | <i>STX5</i>      | 2.02 ± 0.39        | 0.0183         |
| O95298                                                        | NADH dehydrogenase [ubiquinone] 1 subunit C2                                          | <i>NDUFC2</i>    | 1.91 ± 0.23        | 0.0135         |
| Q96159                                                        | Pprobable asparagine--tRNA ligase, mitochondrial                                      | <i>NARS2</i>     | 1.88 ± 0.06        | 0.0263         |
| Q9UQ53                                                        | Isoform 3 of Alpha-1,3-mannosyl-glycoprotein 4-beta-N-acetylglucosaminyltransferase B | <i>MGAT4B</i>    | 1.87 ± 0.45        | 0.0339         |
| Q14320                                                        | Protein FAM50A                                                                        | <i>FAM50A</i>    | 1.82 ± 0.12        | 0.0387         |
| Q14117                                                        | Dihydropyrimidinase                                                                   | <i>DPYS</i>      | 1.73 ± 0.15        | 0.0359         |
| P15907                                                        | Beta-galactoside alpha-2,6-sialyltransferase 1                                        | <i>ST6GAL1</i>   | 1.65 ± 0.33        | 0.0371         |
| O95197                                                        | Isoform 3 of Reticulon-3                                                              | <i>RTN3</i>      | 1.62 ± 0.04        | 0.0111         |
| P63208                                                        | S-phase kinase-associated protein 1                                                   | <i>SKP1</i>      | 1.59 ± 0.15        | 0.0298         |
| Q9Y3B2                                                        | Exosome complex component csl4                                                        | <i>EXOSC1</i>    | 1.55 ± 0.17        | 0.0181         |
| Q9BVV7                                                        | Mitochondrial import inner membrane translocase subunit TIM21                         | <i>TIMM21</i>    | 1.52 ± 0.18        | 0.0368         |
| P28072                                                        | Proteasome subunit beta type-6                                                        | <i>PSMB6</i>     | 1.44 ± 0.09        | 0.0241         |
| Q9ULA0                                                        | Aspartyl aminopeptidase                                                               | <i>DNPEP</i>     | 1.42 ± 0.06        | 0.0075         |
| Q9HD45                                                        | Transmembrane 9 superfamily member 3                                                  | <i>TM9SF3</i>    | 1.41 ± 0.1         | 0.0258         |
| Q9H6R3                                                        | Acyl-CoA synthetase short-chain family member 3, mitochondrial                        | <i>ACSS3</i>     | 1.31 ± 0.11        | 0.0214         |
| O15382                                                        | Branched-chain-amino-acid aminotransferase, mitochondrial                             | <i>BCAT2</i>     | 1.3 ± 0.09         | 0.0270         |
| Q9NX47                                                        | E3 ubiquitin-protein ligase MARCH5                                                    | <i>MARCH5</i>    | 1.3 ± 0.13         | 0.0489         |
| Q5JTZ9                                                        | Alanine--tRNA ligase, mitochondrial                                                   | <i>AARS2</i>     | 1.21 ± 0.06        | 0.0202         |
| Q6P1M0                                                        | Long-chain fatty acid transport protein 4                                             | <i>SLC27A4</i>   | 1.17 ± 0.01        | 0.0019         |
| P04406                                                        | Glyceraldehyde-3-phosphate dehydrogenase                                              | <i>GAPDH</i>     | 1.18 ± 0.13        | 0.2236         |
| P60709                                                        | Actin, cytoplasmic 1                                                                  | <i>ACTB</i>      | 1.03 ± 0.3         | 0.9894         |
| P56182                                                        | Ribosomal RNA processing protein 1 homolog A                                          | <i>RRP1</i>      | -1.32 ± 0.07       | 0.0402         |
| P36543                                                        | V-type proton ATPase subunit E 1                                                      | <i>ATP6V1E1</i>  | -2.16 ± 0.25       | 0.0460         |



**Supplemental Table 3. Relative-quantitation proteomics analysis of protein expression changes with NVP treatment of cryopreserved human hepatocytes.** Cryopreserved pooled-donor (10, mixed-sex) primary human hepatocytes were treated for 48 hours with vehicle (0.1% DMSO) or 10  $\mu$ M NVP. Cell lysate was then prepared for and subjected to Top10 nanoLC-MS based proteomics, with data analysis performed in Proteome Discoverer 2.1, using Sequest HT for peptide spectral matching/protein identification and precursor ion area detection for relative quantitation. Up to 10 unique or razor peptides were used in protein precursor ion-based quantitation. Statistically significant relative quantitation changes are shown for treatment with NVP as compared to vehicle, as well as the results for housekeeping proteins actin and GAPDH. UniProt proteome *Homo sapiens* 9606 was used for protein identification profiling, with UniProt accession numbers, protein entry (protein name), and gene name's provided. P-values were generated using un-paired t-test and effect size calculated using Cohen's d equation. Data are representative of experiments with three different 10-donor pools of hepatocytes.

| Protein Changes with 12-D <sub>3</sub> NVP Treatment (in comparison to Vehicle) |                                                                      |                |                       |         |
|---------------------------------------------------------------------------------|----------------------------------------------------------------------|----------------|-----------------------|---------|
| UniProt Accession                                                               | UniProt Entry                                                        | Gene Name      | Fold Change           | P-Value |
| Q9Y5U8                                                                          | Mitochondrial pyruvate carrier 1                                     | <i>MPC1</i>    | 15.96 ± 11.14         | 0.0015  |
| P60059                                                                          | Protein transport protein Sec61 subunit gamma                        | <i>SEC61G</i>  | 1.96 ± 0.21           | 0.0285  |
| Q96CU9                                                                          | FAD-dependent oxidoreductase domain-containing protein 1             | <i>FOXRED1</i> | 1.95 ± 0.27           | 0.0343  |
| Q15397                                                                          | Pumilio homolog 3                                                    | <i>PUM3</i>    | 1.94 ± 0.37           | 0.0320  |
| P33261                                                                          | Cytochrome P450 2C19                                                 | <i>CYP2C19</i> | 1.79 ± 0.12           | 0.0339  |
| Q8WUK0                                                                          | Phosphatidylglycerophosphatase and protein-tyrosine phosphatase 1    | <i>PTPMT1</i>  | 1.74 ± 0.01           | 0.0225  |
| P60709                                                                          | Actin, cytoplasmic 1                                                 | <i>ACTB</i>    | -1.13 ± 0.06          | 0.1272  |
| P04406                                                                          | Glyceraldehyde-3-phosphate dehydrogenase                             | <i>GAPDH</i>   | -1.17 ± 0.11          | 0.1835  |
| P16152                                                                          | Carbonyl reductase [NADPH] 1                                         | <i>CBR1</i>    | -1.25 ± 0.04          | 0.0082  |
| O94973                                                                          | AP-2 complex subunit alpha-2                                         | <i>AP2A2</i>   | -1.3 ± 0.07           | 0.0373  |
| Q02252                                                                          | Methylmalonate-semialdehyde dehydrogenase [acylating], mitochondrial | <i>ALDH6A1</i> | -1.32 ± 0.06          | 0.0229  |
| P42765                                                                          | 3-ketoacyl-CoA thiolase, mitochondrial                               | <i>AGAA2</i>   | -1.33 ± 0.02          | 0.0244  |
| Q9ULC5                                                                          | Isoform 2 of Long-chain-fatty-acid--CoA ligase 5                     | <i>ACSL5</i>   | -1.36 ± 0.09          | 0.0371  |
| P61604                                                                          | 10 kDa heat shock protein, mitochondrial                             | <i>HSPE1</i>   | -1.38 ± 0.06          | 0.0291  |
| P26440                                                                          | Isovaleryl-CoA dehydrogenase, mitochondrial                          | <i>IVD</i>     | -1.39 ± 0.09          | 0.0349  |
| Q13243                                                                          | Serine/arginine-rich splicing factor 5                               | <i>SRSF5</i>   | -1.45 ± 0.06          | 0.0035  |
| Q6YN16                                                                          | Hydroxysteroid dehydrogenase-like protein 2                          | <i>HSDL2</i>   | -1.46 ± 0.05          | 0.0052  |
| Q96I99                                                                          | Succinyl-CoA ligase [GDP-forming] subunit beta, mitochondrial        | <i>SUCLG2</i>  | -1.48 ± 0.1           | 0.0302  |
| Q9UJZ1                                                                          | Stomatin-like protein 2, mitochondrial                               | <i>STOML2</i>  | -1.53 ± 0.1           | 0.0441  |
| Q9BYG3                                                                          | MKI67 FHA domain-interacting nucleolar phosphoprotein                | <i>NIFK</i>    | -1.54 ± 0.08          | 0.0188  |
| Q9BYT8                                                                          | Neurolysin, mitochondrial                                            | <i>NLN</i>     | -1.57 ± 0.13          | 0.0332  |
| P51398                                                                          | 28S ribosomal protein S29, mitochondrial                             | <i>DAP3</i>    | -1.62 ± 0.03          | 0.0109  |
| O95297                                                                          | Myelin protein zero-like protein 1                                   | <i>MPZL1</i>   | -1.64 ± 0.03          | 0.0039  |
| O00515                                                                          | Ladinin-1                                                            | <i>LAD1</i>    | -1.66 ± 0.09          | 0.0068  |
| O14561                                                                          | Acyl carrier protein, mitochondrial                                  | <i>NDUFAB1</i> | -1.7 ± 0.15           | 0.0456  |
| Q07020                                                                          | 60S ribosomal protein L18                                            | <i>RPL18</i>   | -1.77 ± 0.15          | 0.0336  |
| Q15392                                                                          | Delta(24)-sterol reductase                                           | <i>DHCR24</i>  | -1.85 ± 0.15          | 0.0397  |
| Q92734                                                                          | Protein TFG                                                          | <i>TFG</i>     | -1.87 ± 0.04          | 0.0497  |
| P62995                                                                          | Transformer-2 protein homolog beta                                   | <i>TRA2B</i>   | -1.94 ± 0.08          | 0.0067  |
| P62241                                                                          | 40S ribosomal protein S8                                             | <i>RPS8</i>    | -1.98 ± 0.16          | 0.0067  |
| Q9UL25                                                                          | Ras-related protein Rab-21                                           | <i>RAB21</i>   | -1.99 ± 0.03          | 0.0482  |
| Q16718                                                                          | NADH dehydrogenase [ubiquinone] 1 alpha subcomplex subunit 5         | <i>NDUFA5</i>  | -2.14 ± 0.1           | 0.0247  |
| Q92552                                                                          | Isoform 2 of 28S ribosomal protein S27, mitochondrial                | <i>MRPS27</i>  | -2.4 ± 0.17           | 0.0490  |
| P61457                                                                          | Pterin-4-alpha-carbinolamine dehydratase                             | <i>PCBD1</i>   | -2.63 ± 0.17          | 0.0042  |
| O15127                                                                          | Secretory carrier-associated membrane protein 2                      | <i>SCAMP2</i>  | -2.68 ± 0.05          | 0.0380  |
| Q7L8L6                                                                          | FAST kinase domain-containing protein 5, mitochondrial               | <i>FASTKD5</i> | -4.73 ± 0.06          | 0.0456  |
| Q96K37                                                                          | Solute carrier family 35 member E1                                   | <i>SLC35E1</i> | Not Found in 12-D3NVP | 0.0151  |

**Supplemental Table 4. Relative-quantitation proteomics analysis of protein expression changes with 12-D<sub>3</sub>NVP treatment of cryopreserved human hepatocytes.** Cryopreserved pooled-donor (10, mixed-sex) primary human hepatocytes were treated for 48 hours with vehicle (0.1% DMSO) or 10 μM 12-D<sub>3</sub>NVP. Cell lysate was then prepared for and subjected to Top10 nanoLC-MS based proteomics, with data analysis performed in Proteome Discoverer 2.1, using Sequest HT for peptide spectral matching/protein identification and precursor ion area detection for relative quantitation. Up to 10 unique or razor peptides were used in protein precursor ion-based quantitation. Statistically significant relative quantitation changes are shown for treatment with 12-D<sub>3</sub>NVP as compared to vehicle, as well as the results for housekeeping proteins actin and GAPDH. UniProt proteome *Homo sapiens* 9606 was used for protein identification profiling, with UniProt accession numbers, protein entry (protein name), and gene name's provided. P-values were generated using un-paired t-test and effect size calculated using Cohen's d equation. Data are representative of experiments with three different 10-donor pools of hepatocytes.
